# Supplementary material for: One-pot synthesis of N-doped carbon dots by pyrolyzing the gel composed of ethanolamine and 1-carboxyethyl-3-methylimidazolium chloride and their selective fluorescence sensing for Cr(vi) ions
Source: Royal Society of Chemistry journal article supplement (doi:10.1039/c8an00077h), 2018-01-01
Supplement: c8an00077h1.pdf [file c8an00077h1.pdf]

# **One-pot synthesis of N-doped carbon dots by pyrolyzing the gel composed of ethanolamine and 1- carboxyethyl-3-methylimidazolium chloride and their selective fluorescent sensing for Cr(VI) ions**

Baogang Wang,<sup>\*a,b</sup> Yan Lin,<sup>a</sup> Hui Tan,<sup>a</sup> Mina Luo,<sup>\*a</sup> Shanshan Dai,<sup>a</sup> Hongsheng Lu<sup>a</sup>  
and Zhiyu Huang<sup>a,b</sup>

<sup>a</sup> *College of Chemistry and Chemical Engineering, Southwest Petroleum University,  
Chengdu 610500, P. R. China*

<sup>b</sup> *Oil & Gas Field Applied Chemistry Key Laboratory of Sichuan Province, College of  
Chemistry and Chemical Engineering, Southwest Petroleum University, Chengdu  
610500, P. R. China*

---

\* Corresponding authors. Fax: +86-28-83037330; Tel.: +86-28-83037330.

*Email address:* bgwang@swpu.edu.cn, luo\_mn@126.com

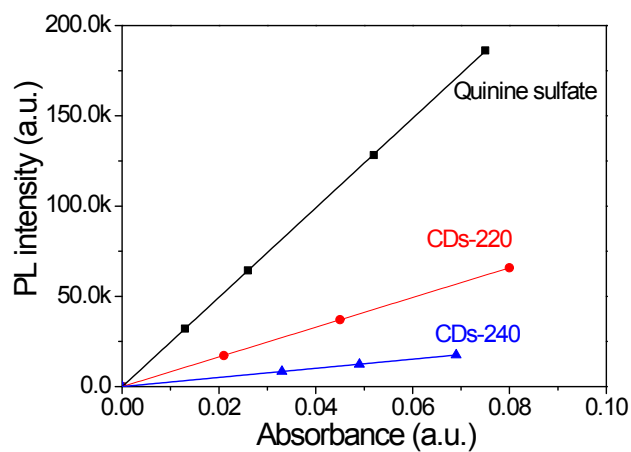

**Fig. S1** PL intensity of 0.1 M H<sub>2</sub>SO<sub>4</sub> aqueous solution of quinine sulfate and CDs varying with their UV-vis absorbance.

**Table S1** The parameters of synthesized CDs at different temperatures.

| Temperature (°C) | Quantum yield (%) | Yield (%) |
|------------------|-------------------|-----------|
| 200              | -                 | -         |
| 220              | 17.93             | 21.85     |
| 240              | 5.52              | 37.80     |

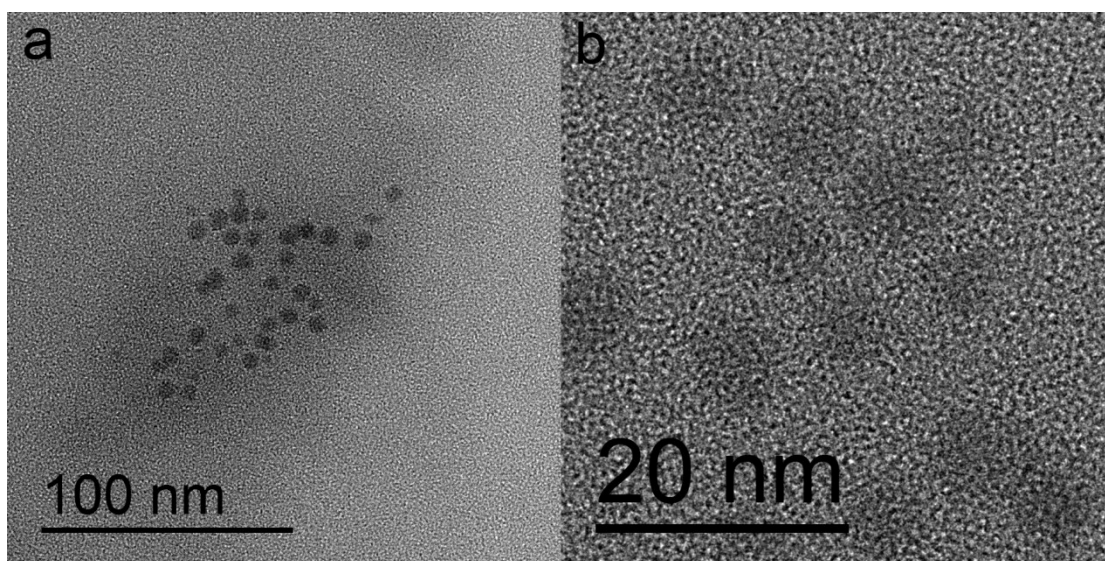

**Fig. S2** The (a) low- and (b) high-resolution TEM images of CDs-240.

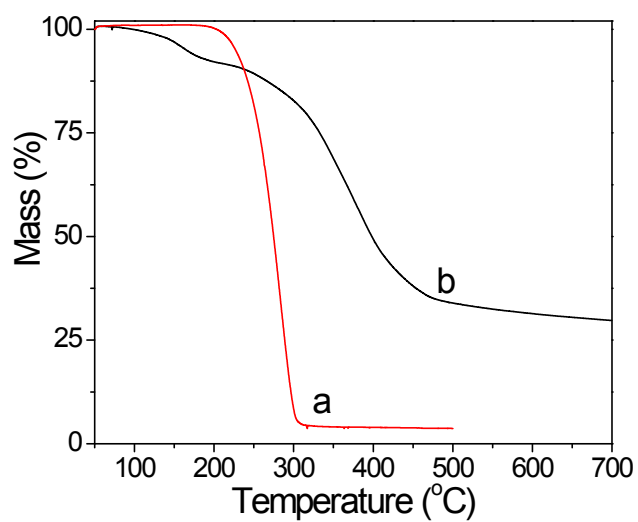

**Fig. S3** TGA curves of (a) 1-carboxyethyl-3-methylimidazolium chloride and (b) CDs-220.

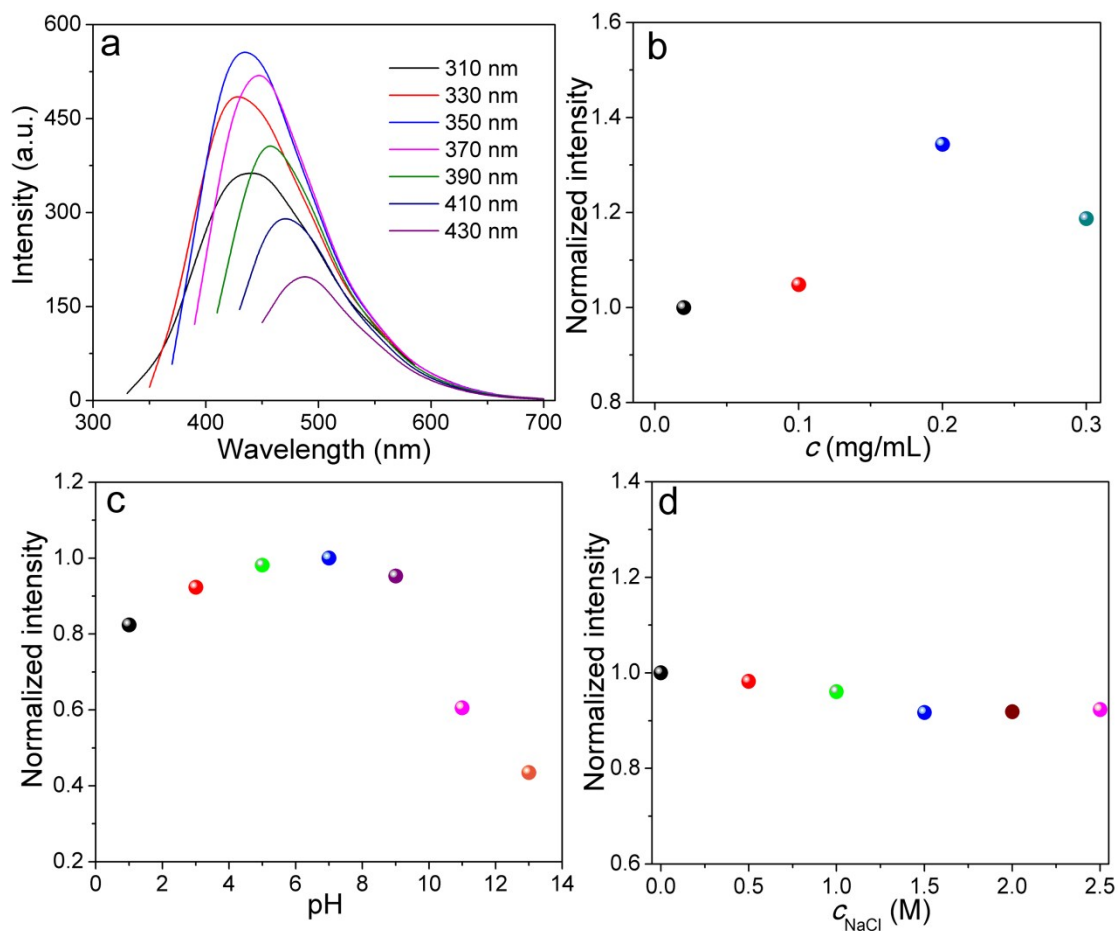

**Fig. S4** (a) PL emission spectra of CDs-220 aqueous suspension (0.02 mg/mL) at different excitation wavelengths. Normalized PL intensity of CDs-220 aqueous suspension excited at 350 nm varying with (b) the concentration ( $c$ ) of CDs-220. Normalized PL intensity of CDs-220 aqueous suspension (0.02 mg/mL) excited at 350 nm varying with (c) the pH and (d) the ionic strength created by NaCl.
